# Supplementary material for: Binding of ankaflavin with bovine serum albumin (BSA) in the presence of carrageenan and protective effects of Monascus yellow pigments against oxidative damage to BSA after forming a complex with carrageenan
Source: Royal Society of Chemistry journal article supplement (doi:10.1039/d2fo02946d), 2023-01-01
Supplement: d2fo02946d1.pdf [file d2fo02946d1.pdf]

***Supplementary data for***

Binding of ankaflavin with bovine serum albumin (BSA) in the presence of carrageenan and protective effects of *Monascus* yellow pigments against oxidative damage to BSA after forming the complex with carrageenan

Shufen Wu<sup>ab</sup>, Wenyu Wang<sup>a</sup>, Jingwen Lu<sup>a</sup>, Weili Deng<sup>a</sup>, Nan Zhao<sup>a</sup>, Yue Sun<sup>a</sup>, Huanhuan Liu<sup>a</sup>, Zhenjing Li<sup>a</sup>, Mianhua Chen<sup>a</sup>, Lei Cheng<sup>b</sup>, Qingbin Guo<sup>a\*</sup>, Changlu Wang<sup>a\*</sup>, Xin Peng<sup>cd\*</sup>

<sup>a</sup>Key Laboratory of Food Nutrition and Safety, Ministry of Education, College of Food Science and Engineering, Tianjin University of Science and Technology, Tianjin 300457, PR China

<sup>b</sup>Beijing Engineering and Technology Reserch Center of Food Additives, Beijing Technology & Business University (BTBU), Beijing 100048, PR China

<sup>c</sup>School of Life Sciences, Tianjin University, Tianjin 300072, PR China

<sup>d</sup>State Key Laboratory for Chemistry and Molecular Engineering of Medicinal Resources, Guangxi Normal University, Guilin 541004, PR China

---

\* Corresponding author

E-mail address: [pengxin5403@tju.edu.cn](mailto:pengxin5403@tju.edu.cn)(X. Peng).

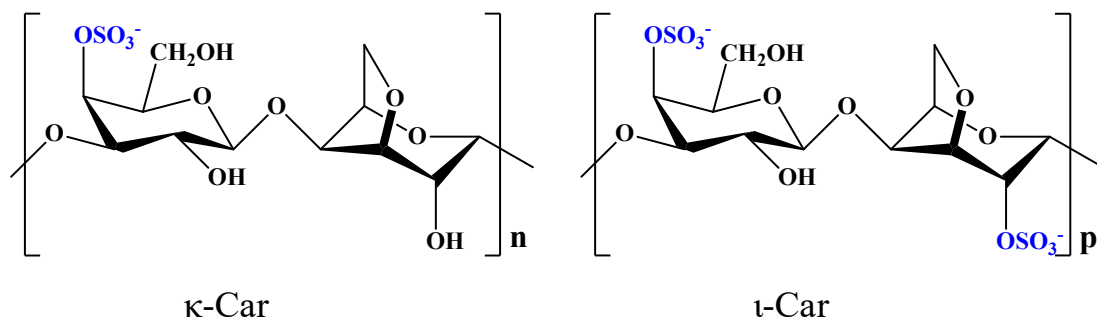

**Fig. S1.** The chemical structures of  $\kappa\text{-Car}$  and  $\iota\text{-Car}$ .

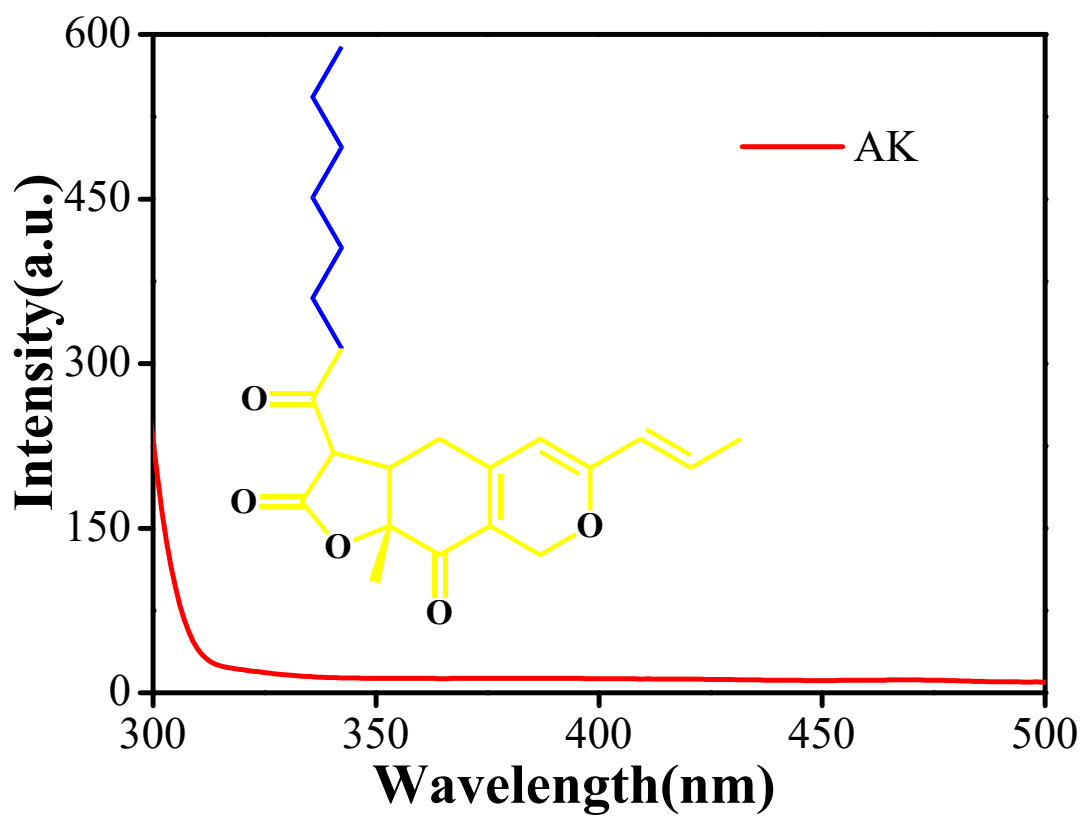

**Fig. S2.** The fluorescence spectra of AK at 298 K,  $\lambda_{\text{ex}} = 280$  nm. The insert shows the chemical structure of AK.

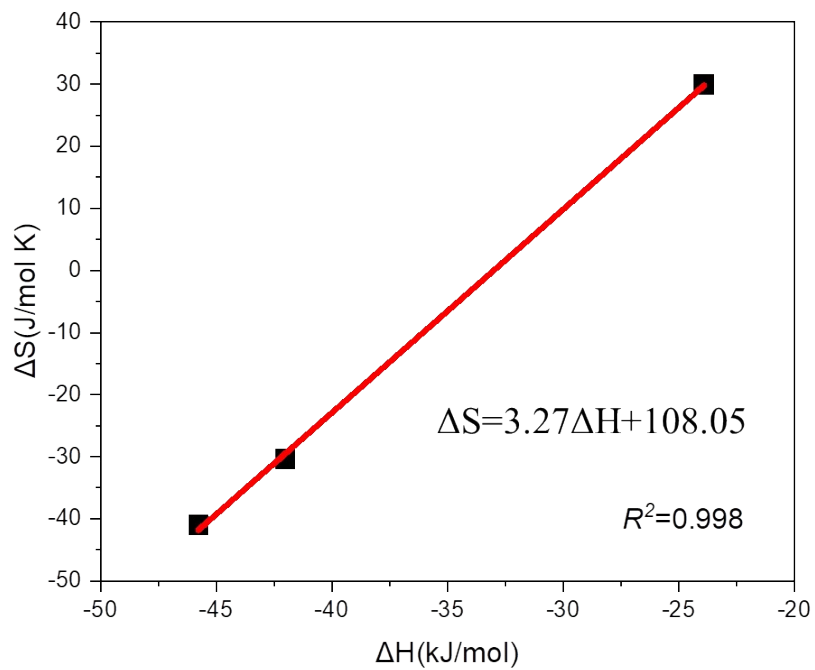

**Fig. S3.** Plot of  $\Delta S$  vs  $\Delta H$ .

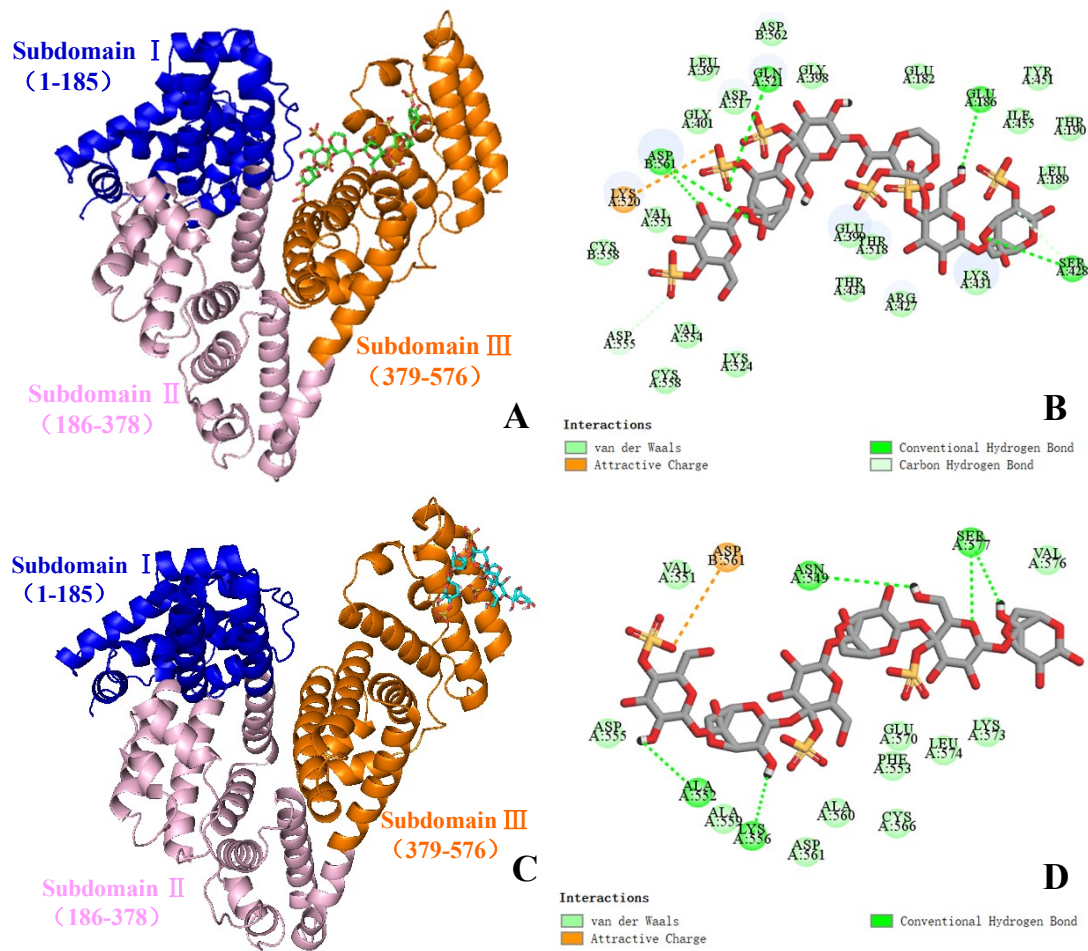

**Fig. S4.** The most favorable docking poses of BSA- $\iota$ -Car complex (A) and BSA- $\kappa$ -Car complex (B) by blind docking. The 2D detailed view shows the interactions between  $\iota$ -Car (C) or  $\kappa$ -Car (D) and the neighboring residues. (For interpretation of the references to color in this figure legend, the reader is referred to the web version of this article.)

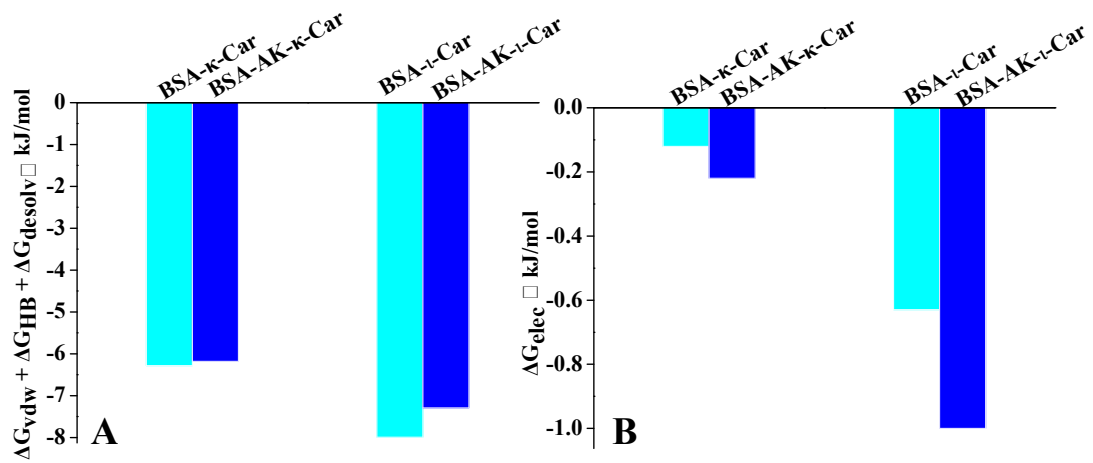

**Fig. S5.** Calculated interaction energy components ( $\Delta G_{vdw} + \Delta G_{hbond} + \Delta G_{solvation}$ ) (A) and  $\Delta G_{elec}$  (B) of BSA- $\kappa$ -Car, BSA-AK- $\kappa$ -Car, BSA- $\iota$ -Car, and BSA-AK- $\iota$ -Car complexes.

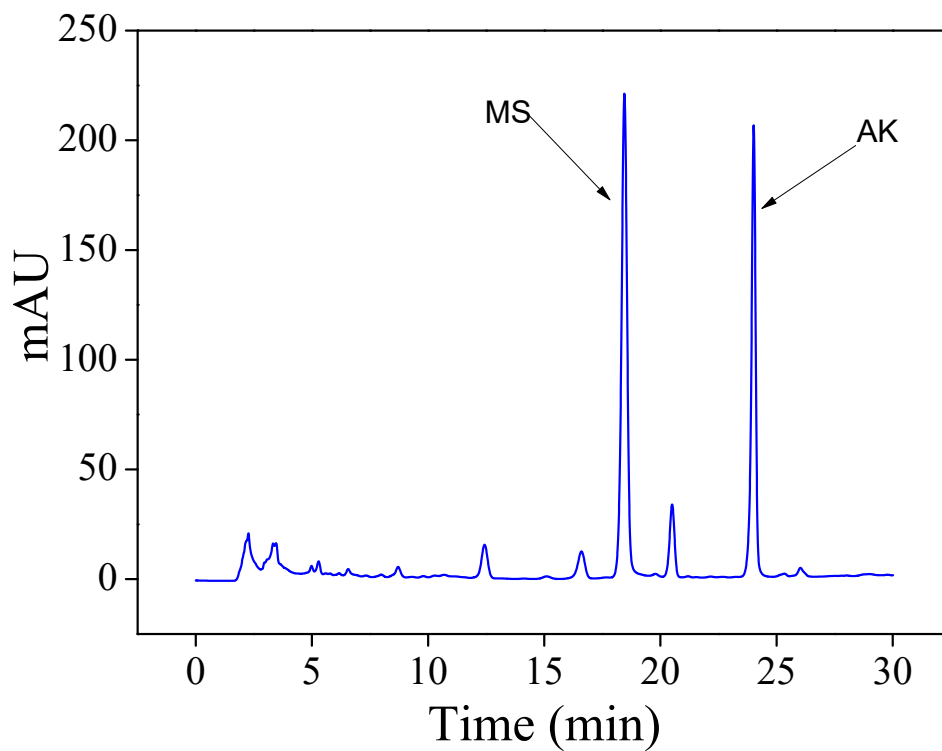

**Fig. S6.** HPLC profile of Mps rich in MS and AK <sup>1</sup>.

References

1.D. Chen, C. Xue, M. Chen, S. Wu, Z. Li and C. Wang, Effects of blue light on pigment biosynthesis of *Monascus*, *J. Microbiol.*, 2016, **54**, 305-310.

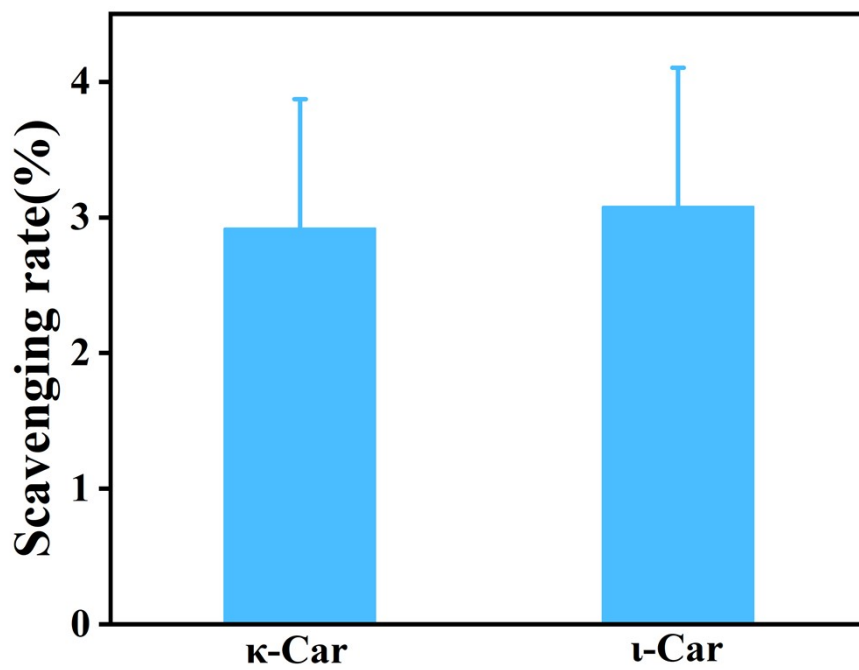

**Fig. S7.** DPPH radical scavenging activity of  $\kappa$ -Car and  $\iota$ -Car, condition:  $C_{\iota\text{-Car}}/C_{\kappa\text{-Car}} = 1.5$  g/L.
